# Supplementary material for: Green synthesis of primary, secondary, and tertiary amides through oxidative amidation of methyl groups with amine hydrochlorides over recyclable CoFe2O4 NPs
Source: Royal Society of Chemistry journal article supplement (doi:10.1039/c6ra20902e), 2016-01-01
Supplement: c6ra20902e1.pdf [file c6ra20902e1.pdf]

## Electronic Supplementary Information

# Green synthesis of primary, secondary, and tertiary amides through oxidative amidation of methyl groups with amine hydrochlorides over recyclable $\text{CoFe}_2\text{O}_4$ NPs

Esmail Eidi, Mohammad Zaman Kassaei \*

\*Department of Chemistry, Tarbiat Modares University, P.O.Box 14155-175, Tehran, Iran

Fax: +98-21-88006544; Tel.: +98-912-1000392; +98-21-82883444

E-mail: [kassaeem@modares.ac.ir](mailto:kassaeem@modares.ac.ir) and [drkassaei@yahoo.com](mailto:drkassaei@yahoo.com)

## Table of Contents

|                                                                                                  |        |
|--------------------------------------------------------------------------------------------------|--------|
| 1. General .....                                                                                 | S2     |
| 2. Experimental Section .....                                                                    | S2     |
| 2.1. Preparation of magnetic $\text{CoFe}_2\text{O}_4$ nanoparticles (MNPs) .....                | S2     |
| 2.2. General procedure for direct amidation of methylarenes with amine hydrochloride salts ..... | S2     |
| 3. Catalyst Characterization .....                                                               | S3-S5  |
| 4. Recyclability of the catalyst .....                                                           | S5     |
| 5. Characterization of the corresponding amides .....                                            | S6-S20 |

## 1. General

All chemical reagents used in our experiments were purchased from Merck or Aldrich Chemical Company with high purity. All solvents were distilled, dried and purified using standard procedures. Melting points were measured on an Electrothermal 9100 apparatus.  $^1\text{H}$  NMR and  $^{13}\text{C}$  NMR spectra were recorded on a Bruker Avance (DPX 500 MHz and DPX 125 MHz) in pure deuterated  $\text{CDCl}_3$  solvent using tetramethylsilane (TMS) as an internal reference. Fourier transform infrared (FT-IR) spectra were recorded using KBr pellets on a Nicolet IR-100 infrared spectrometer. The powder X-ray diffraction spectrum was recorded at room temperature using a Philips X-Pert 1710 diffractometer. The latter appeared with  $\text{Co K}\alpha$  ( $\alpha=1.79285 \text{ \AA}$ ) voltage: 40 kV, current: 40 mA and was in the range of  $20^\circ\text{--}80^\circ$  ( $2\theta$ ) with a scan speed of  $0.02^\circ/\text{s}$ . The particle morphology was examined by scanning electron microscopy using SEM (HITACHI S-4160) on gold coated samples. Magnetic properties were obtained by a vibrating magnetometer/Alternating Gradient Force Magnetometer (VSM/AGFM, MDK Co., Iran).

## 2. Experimental Section

### 2.1 Preparation of magnetic $\text{CoFe}_2\text{O}_4$ nanoparticles (MNPs)

Magnetic  $\text{CoFe}_2\text{O}_4$  nanoparticles were prepared by chemical co-precipitation chlorine salt of  $\text{Fe}^{3+}$  and  $\text{Co}^{2+}$  ions with a molar ratio of 2:1. Typically,  $\text{FeCl}_3 \cdot 6\text{H}_2\text{O}$  (5.8g, 0.02mol) and  $\text{CoCl}_2$  (1.3g, 0.01mol) were dissolved in 100 mL deionized water at  $80^\circ\text{C}$  under  $\text{N}_2$  atmosphere and vigorous stirring. Then, 10 mL of 25%  $\text{NH}_4\text{OH}$  was quickly injected into the reaction mixture in one portion. The addition of the base to the  $\text{Co}^{2+}/\text{Fe}^{3+}$  salt solution results in immediate formation of a black precipitate of MNPs. The reaction was continued for another 60 min and the mixture was cooled to room temperature. The black precipitate was washed with doubly warm distilled water (Scheme 4).

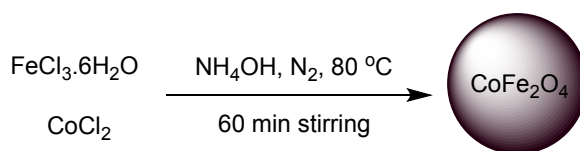

Preparation of magnetic  $\text{CoFe}_2\text{O}_4$  nanocatalyst.

### 2.2 General procedure for direct amidation of methylarenes with amine hydrochloride salts

A mixture was made that consisted of catalyst (20 mg), an amine hydrochloride salt (1.5 mmol),  $\text{CaCO}_3$  (3 equiv.), methylarenes (1 mmol), and *t*-BuOOH (70 wt% in  $\text{H}_2\text{O}$ , 6 equiv.), in  $\text{CH}_3\text{CN}$  (2 mL), under an argon atmosphere for appropriate time at  $80^\circ\text{C}$ . After completion of the reaction (monitored by TLC), the reaction mixture was cooled to room temperature and diluted with EtOAc. The catalyst was separated using an external magnet, washed several times with EtOAc and dried under vacuum at room temperature to be ready for a later run. The mixture was extracted with EtOAc, then the combined organic phases were dried over anhydrous  $\text{MgSO}_4$  and the solvent was

evaporated under reduced pressure. The crude product was purified by silica gel column chromatography to provide the desired amides.

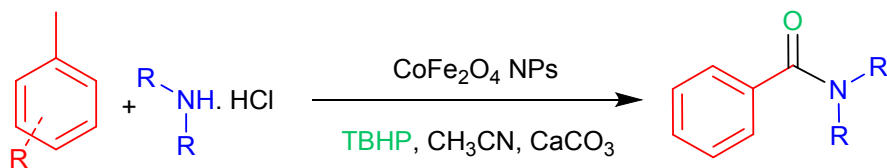

Oxidative amidation of methylenes catalysed by CoFe<sub>2</sub>O<sub>4</sub> NPs.

### 3. Catalyst Characterization

Characterization of CoFe<sub>2</sub>O<sub>4</sub> NPs is done via fourier transform infrared (FT-IR), vibrating sample magnetometry (VSM), Energy-dispersive spectrum (EDS), scanning electron microscopy (SEM), thermal gravimetric analysis (TGA), and X-ray diffraction (XRD) analyses.

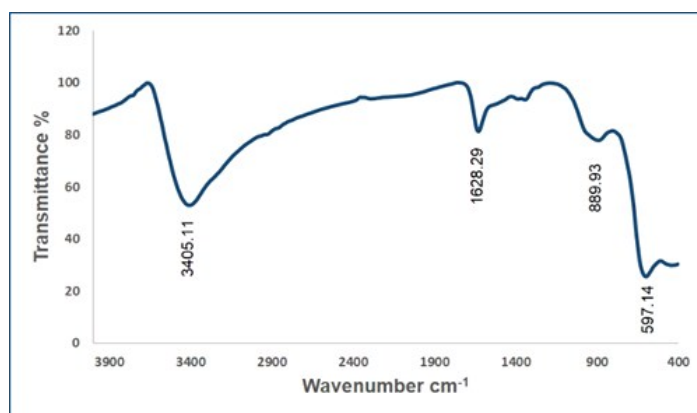

FT-IR Spectrum of CoFe<sub>2</sub>O<sub>4</sub> NPs.

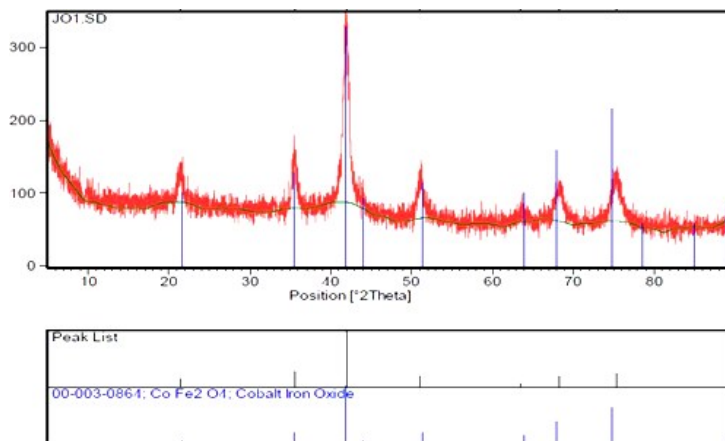

XRD Pattern of the catalyst CoFe<sub>2</sub>O<sub>4</sub> NPs.

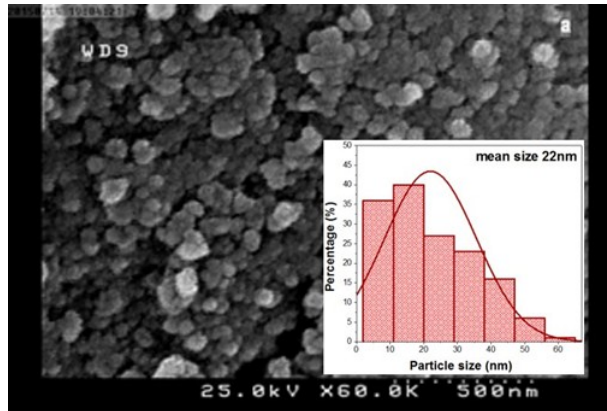

SEM analysis of the catalyst CoFe<sub>2</sub>O<sub>4</sub> NPs

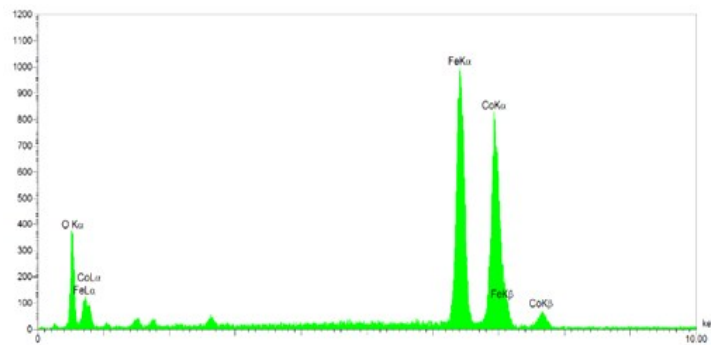

Energy-dispersive spectrum (EDS) of CoFe<sub>2</sub>O<sub>4</sub> NPs.

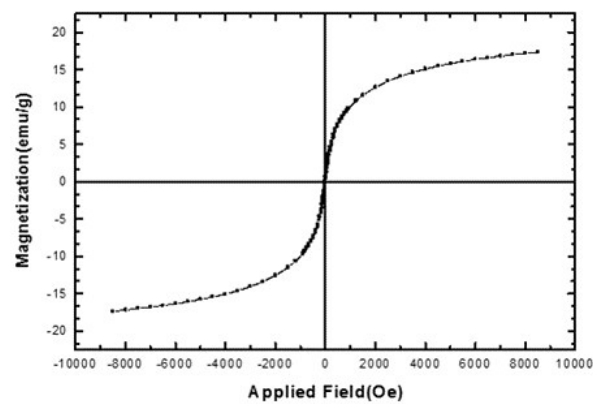

Vibrating sample magnetometer (VSM) curve for CoFe<sub>2</sub>O<sub>4</sub> NPs.

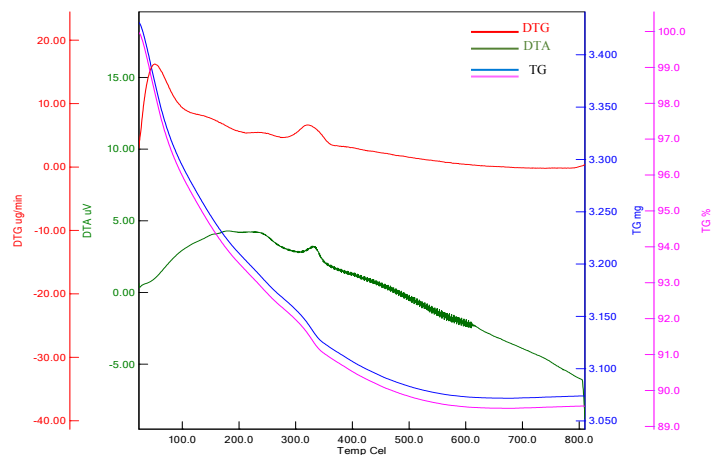

TGA/DTA/DTG analysis of  $\text{CoFe}_2\text{O}_4$  NPs.

#### 4. Recyclability of the catalyst

Reusability of the catalyst is evaluated under the reaction conditions described above for the model reaction. After completion of the reaction, the catalyst is easily recovered by applying a strong external permanent magnet, followed by washing with ethanol to remove the residual product(s). Then the recovered catalyst is dried under vacuum, and reused directly for the next cycle without further treatment. The catalyst is used over five runs, and no obvious loss in the catalytic activity is observed.

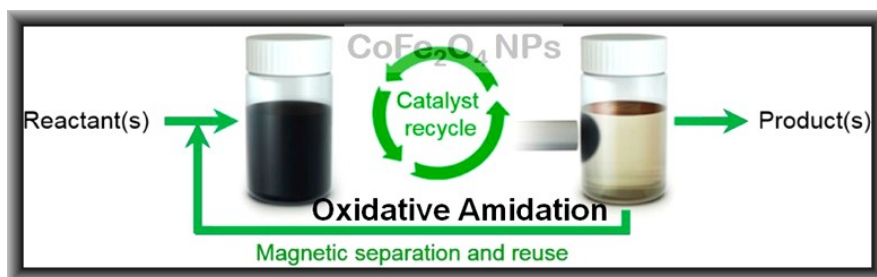

Separation of the catalyst from the reaction mixture by an external magnet.

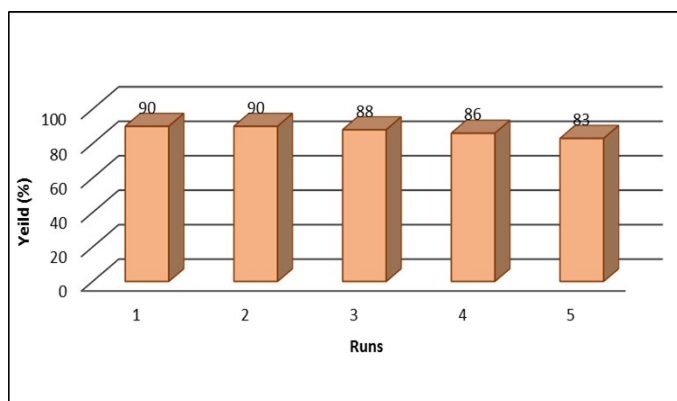

Reusability of  $\text{CoFe}_2\text{O}_4$  nanoparticles in synthesis of amides.

## 5. Characterization of the corresponding amides

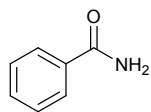

benzamide: Isolated yield = 78%;  $^1\text{H NMR}$  (500 MHz,  $\text{CDCl}_3$ ):  $\delta_{\text{H}}$  (ppm) = 7.80-7.75 (m, 2H), 7.50- 7.27 (m, 8H), 6.6 (br s, 1H), 4.63 (m, 2H); FT-IR (KBr):  $\nu$  ( $\text{cm}^{-1}$ ) = 3371, 3175, 1659, 1399, 1121.

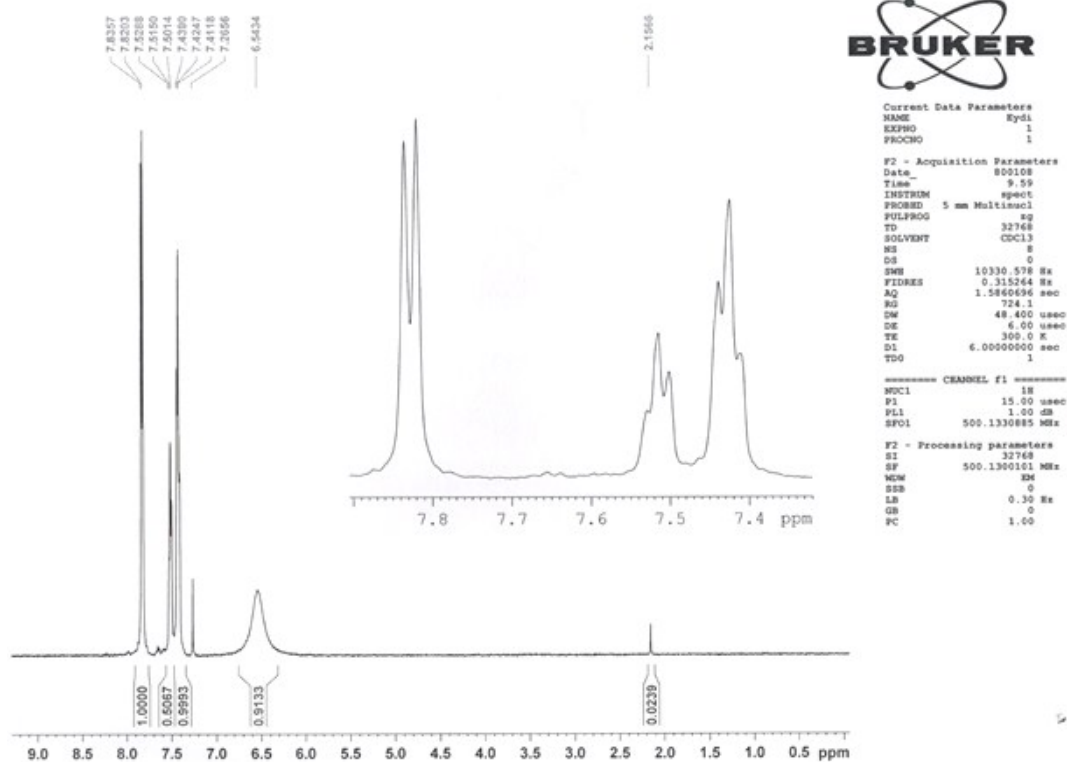

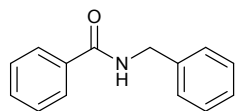

N-benzylbenzamide: Isolated yield = 90%;  $^1\text{H}$  NMR (500 MHz,  $\text{CDCl}_3$ ):  $\delta_{\text{H}}$  (ppm) = 7.80-7.75 (m, 2H), 7.50-7.27 (m, 8H), 6.6 (br s, 1H), 4.63 (m, 2H);  $^{13}\text{C}$  NMR (125 MHz,  $\text{CDCl}_3$ ):  $\delta_{\text{C}}$  (ppm) = 167.4, 138.3, 134.4, 131.5, 128.8, 128.6, 127.9, 127.6, 127.0, 44.1; FT-IR (KBr):  $\nu$  ( $\text{cm}^{-1}$ ) = 3288, 3064, 2922, 1639, 1549, 1488, 1317, 1259.

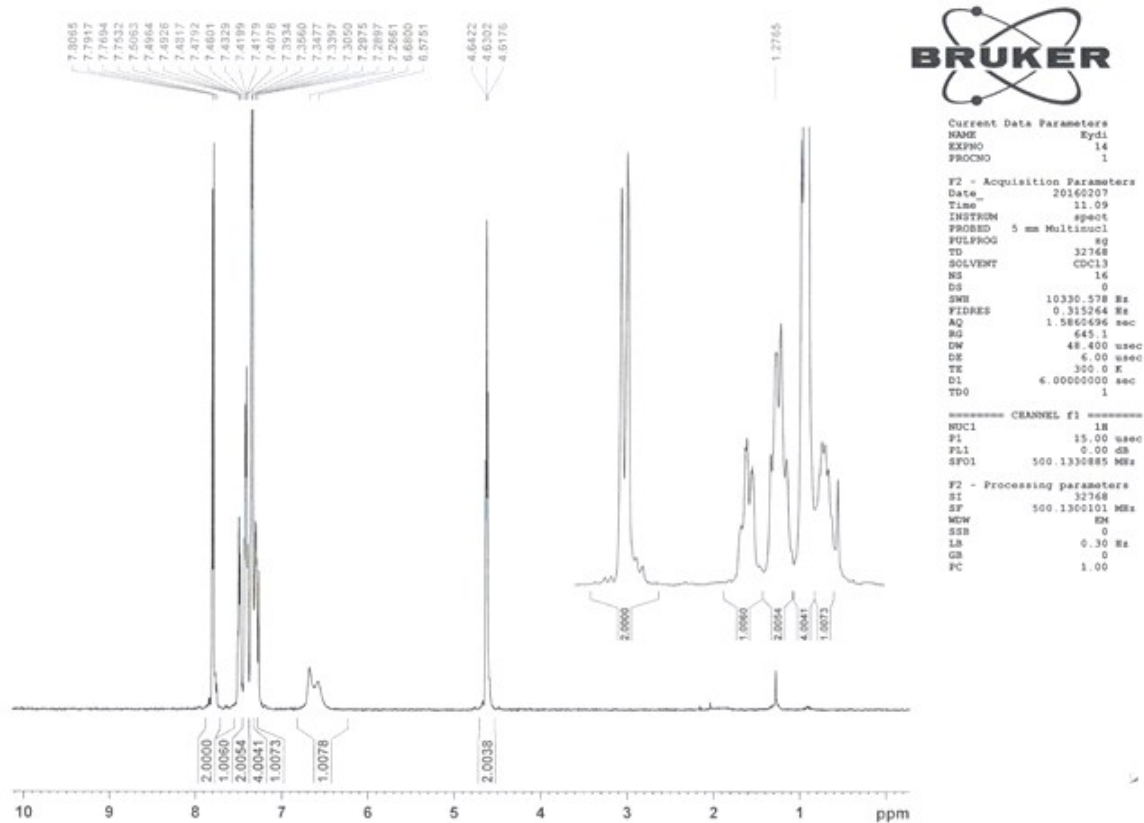

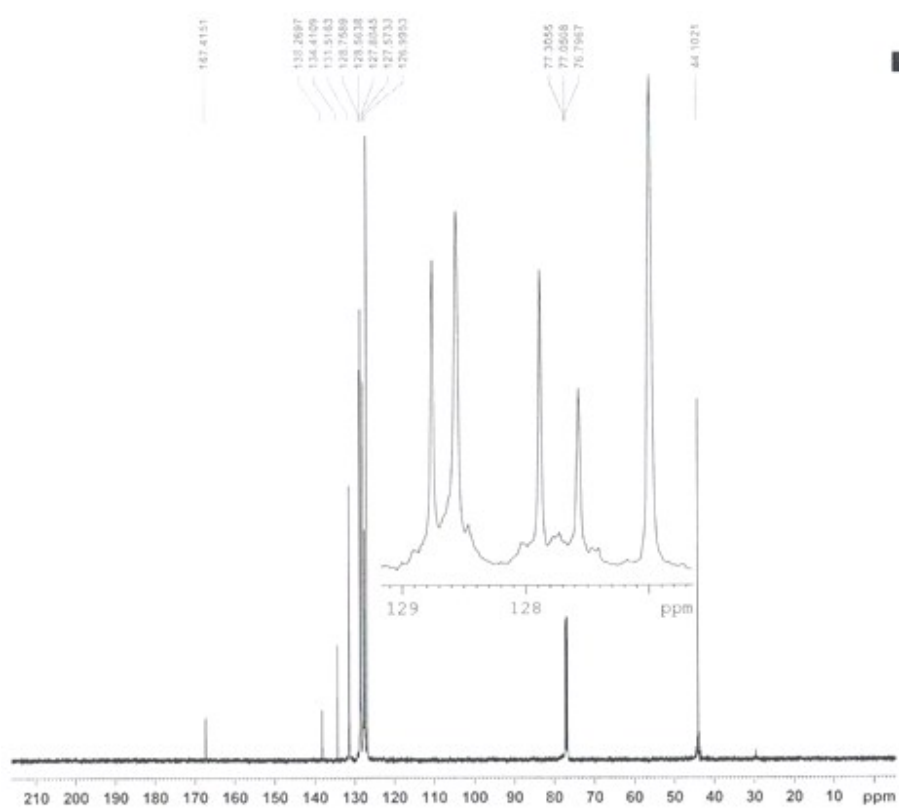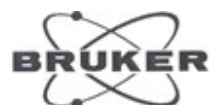

Current Data Parameters  
NAME Kydi  
EXPR0 11  
PROC0 1

F2 - Acquisition Parameters  
Date\_ 20160201  
Time\_ 11.28  
INSTRUM spect  
PROBHD 5 mm Multico-1  
PULPROG zgpg  
TD 65536  
SOLVENT CDCl3  
NS 2000  
DS 0  
SWH 31444.541 Kz  
FIDRES 0.439836 Kz  
AQ 1.0420883 sec  
RG 7299.2  
DM 15.900 usec  
DE 6.00 usec  
TE 300.0 K  
S1 2.0000000 sec  
dS1 0.0300000 sec  
DELTA 1.89999998 sec  
TD0 1

----- CHANNEL f1 -----  
NUC1 13C  
P1 10.00 usec  
PL1 3.00 dB  
SFO1 125.7716224 MHz

----- CHANNEL f2 -----  
CPOPRG2 waltz16  
NUC2 1H  
PCPD2 100.00 usec  
P2 120.00 dB  
PL12 -6.00 dB  
PL13 5.00 dB  
SFO2 500.1320005 MHz

F2 - Processing parameters  
SI 32768  
SF 125.7577910 MHz  
WDW EM  
SSB 0  
LA 1.00 Hz  
GB 0  
PC 1.00



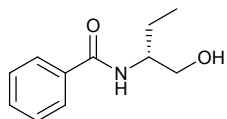

(*R*)-*N*-(1-hydroxybutan-2-yl)benzamide: Isolated yield = 73%;  $^1\text{H}$  NMR (500 MHz,  $\text{CDCl}_3$ ):  $\delta_{\text{H}}$  (ppm) = 7.9 (d, 2H), 7.51 (t, 1H), 7.43 (t, 2H), 6.37 (s, 1H), 4.08 (br s, 1H), 3.82-3.79 (m, 1H), 3.73-3.70 (dd, 1H), 2.51 (br s, 1H), 1.74-1.60 (m, 2H), 1.02 (t, 3H).; IR (KBr):  $\nu$  ( $\text{cm}^{-1}$ ) = 3301, 3067, 2958, 2930, 2868, 1636, 1539, 1454, 1048.

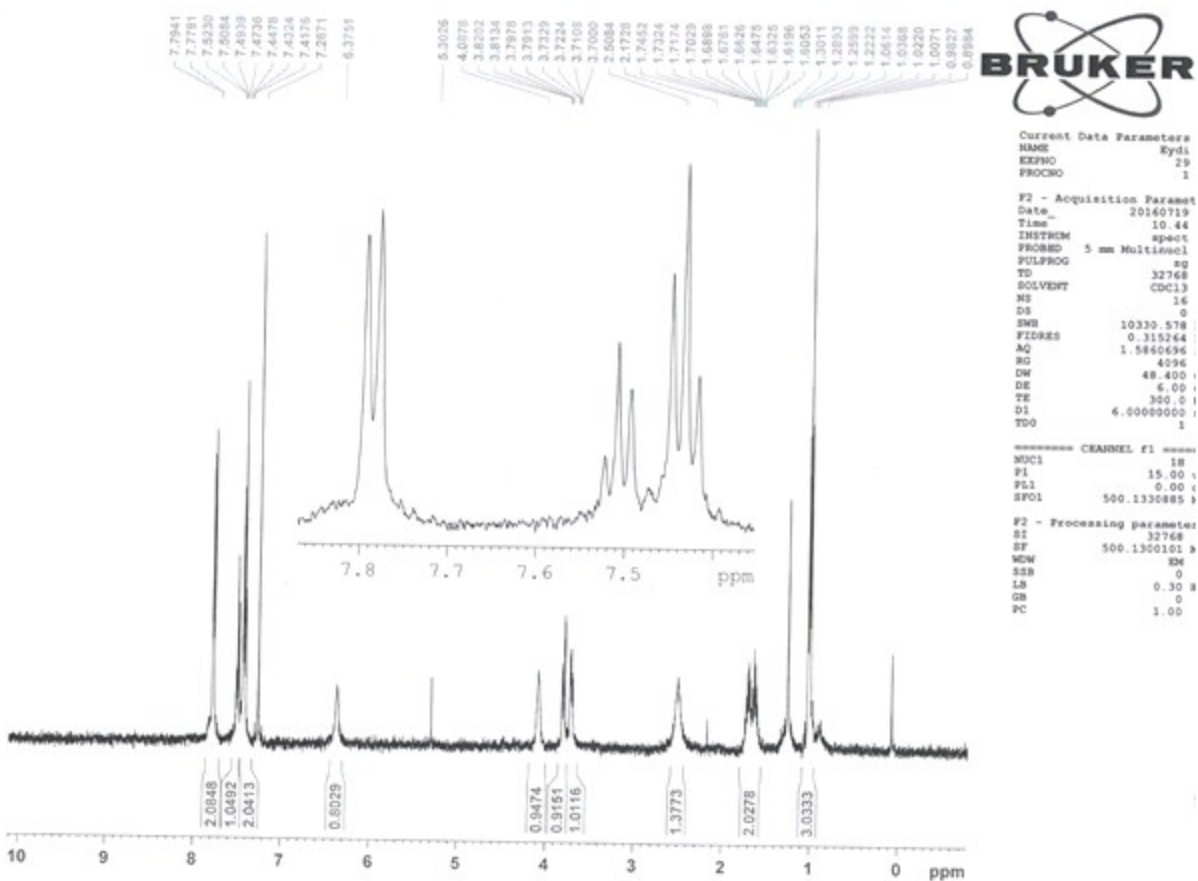

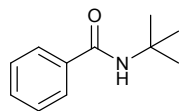

*N*-(*tert*-butyl)benzamide: Isolated yield = 64%;  $^1\text{H}$  NMR (500 MHz,  $\text{CDCl}_3$ ):  $\delta_{\text{H}}$  (ppm) = 7.73-7.71 (d, 2H), 7.50- 7.40 (m, 3H), 5.96 (br s, 1H), 1.48 (s, 9H).; IR (KBr):  $\nu$  ( $\text{cm}^{-1}$ ) = 3323, 3061, 2970, 1638, 1537, 1450, 1310, 1219.

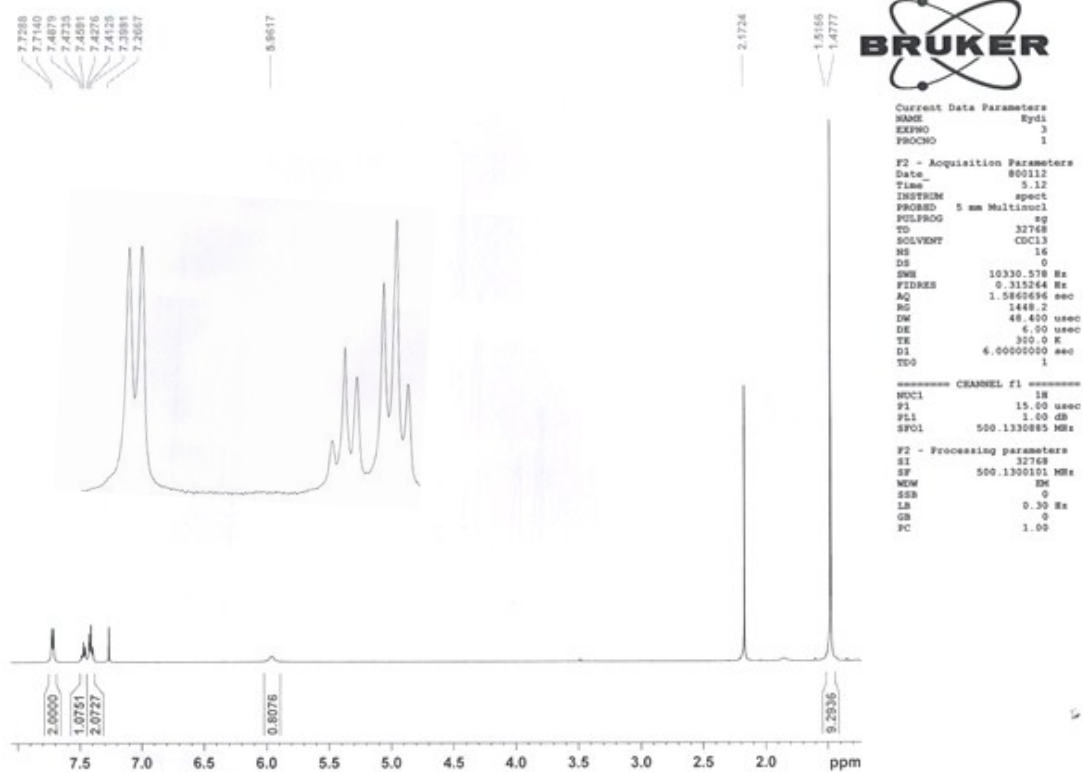

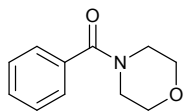

morpholino(phenyl)methanone: Isolated yield = 80%;  $^1\text{H NMR}$  (500 MHz,  $\text{CDCl}_3$ ):  $\delta_{\text{H}}$  (ppm) = 7.42 (m, 5H), 3.78-3.44 (m, 8H).; IR (neat):  $\nu$  ( $\text{cm}^{-1}$ ) = 3060, 2915, 2856, 1633, 1433, 1268.

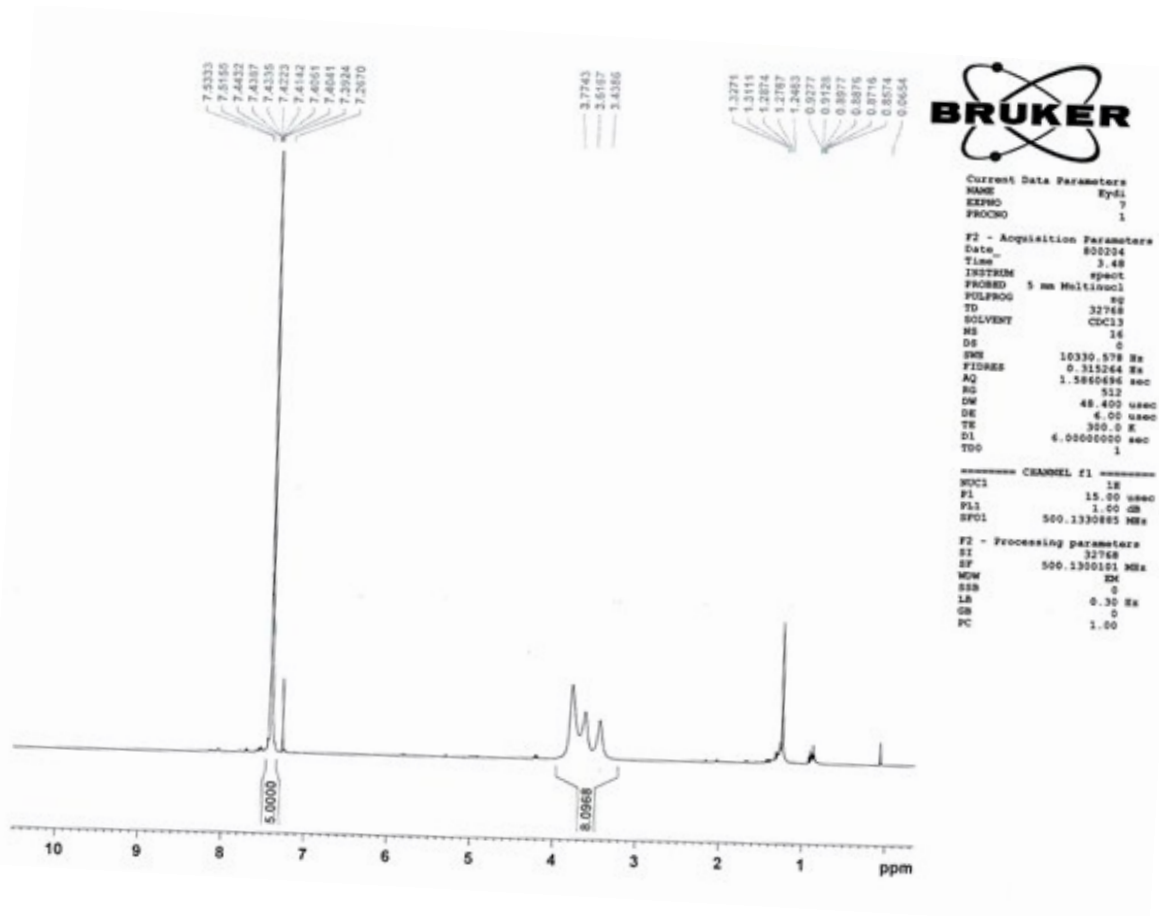

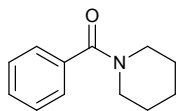

Phenyl(piperidin-1-yl)methanone: Isolated yield = 78%;  $^1\text{H}$  NMR (500 MHz,  $\text{CDCl}_3$ ):  $\delta_{\text{H}}$  (ppm) = 7.39 (m, 5H), 3.72 (m, 2H), 3.35 (m, 2H), 1.68-1.52 (m, 6H); FT-IR (neat):  $\nu$  ( $\text{cm}^{-1}$ ) = 3058, 2923, 2860, 1630, 1437, 1263.

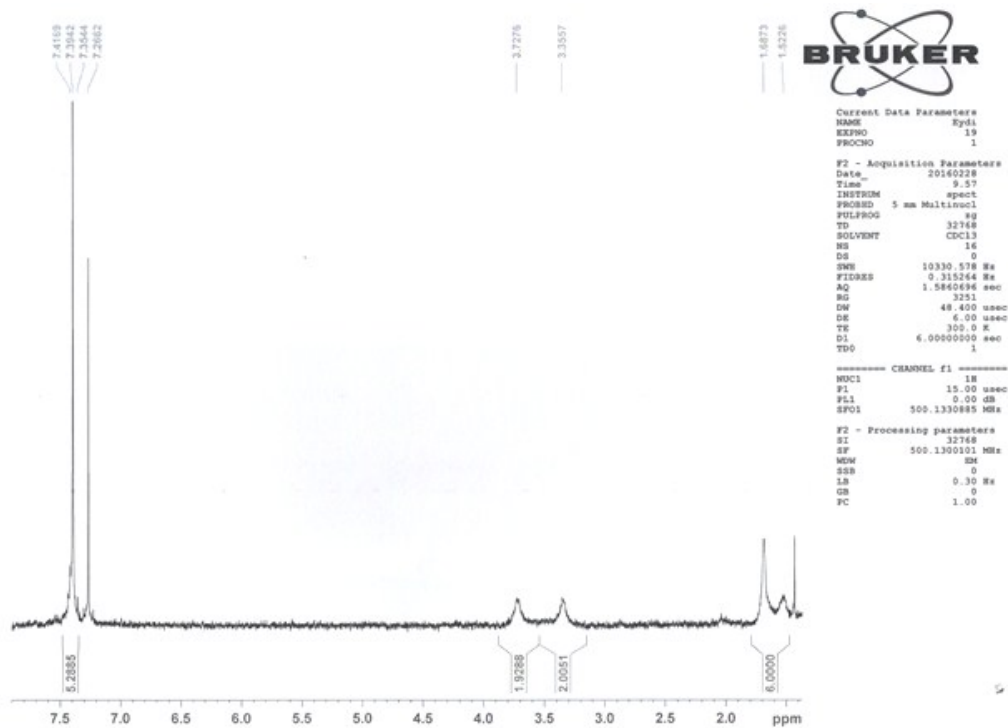

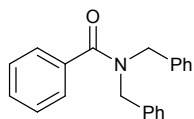

*N,N*-dibenzylbenzamide: Isolated yield = 71%;  $^1\text{H NMR}$  (500 MHz,  $\text{CDCl}_3$ ):  $\delta_{\text{H}}$  (ppm) = 7.54–7.16 (m, 15H), 4.72 (s, 2H), 4.42 (s, 2H); IR (KBr):  $\nu$  ( $\text{cm}^{-1}$ ) = 3062, 2928, 1625, 1431, 1254.

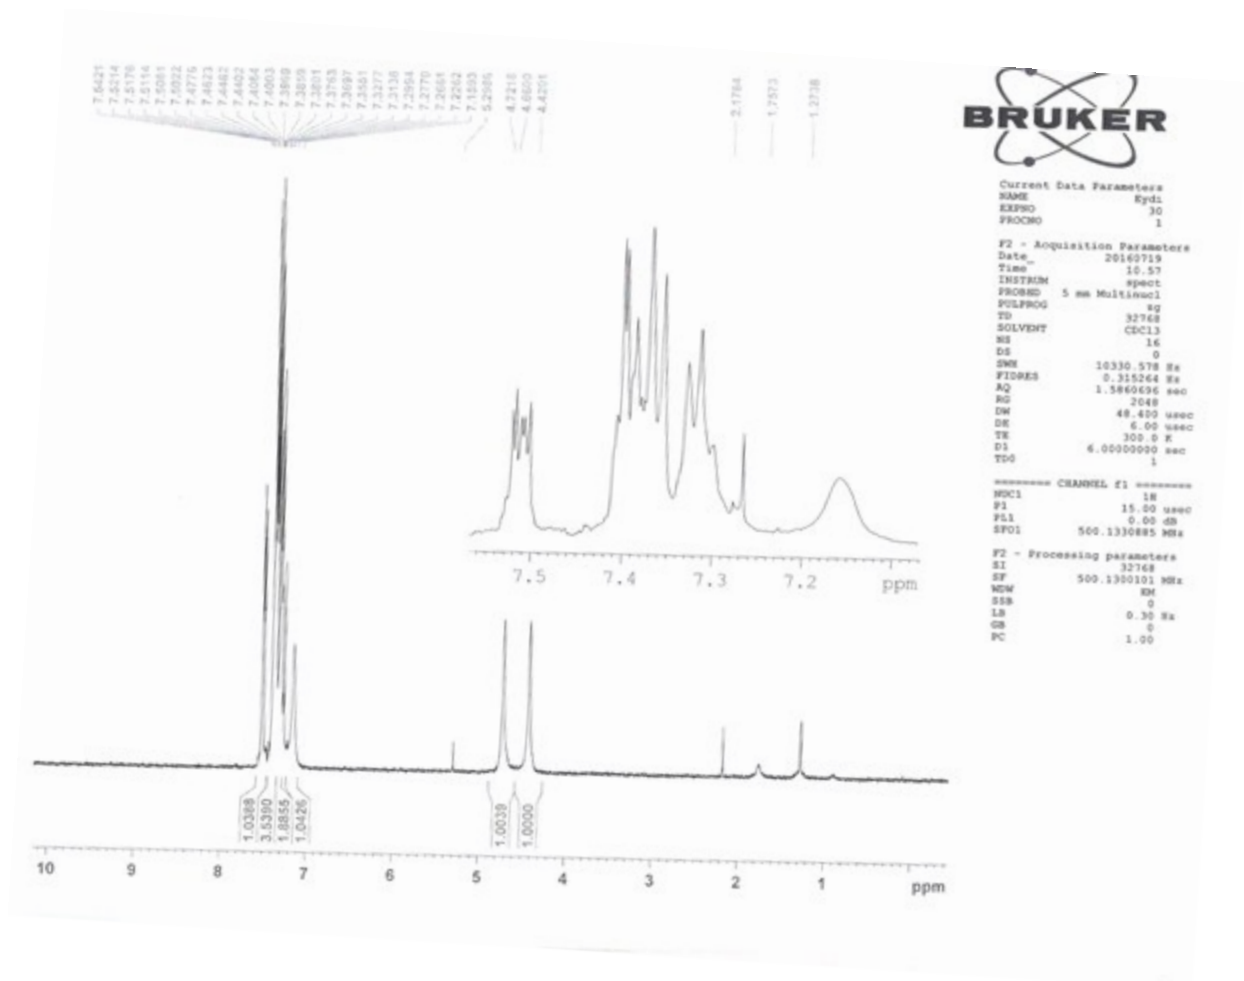

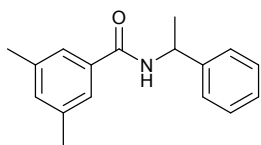

3,5-dimethyl-*N*-(1-phenylethyl)benzamide: Isolated yield = 68%;  $^1\text{H}$  NMR (500 MHz,  $\text{CDCl}_3$ ):  $\delta_{\text{H}}$  (ppm) = 7.41–7.13 (m, 8H), 6.28 (d, 1H), 5.35 (quintet, 1H), 2.35 (s, 6H), 1.63 (d, 3H); IR (KBr):  $\nu$  ( $\text{cm}^{-1}$ ) = 3343, 2927, 1637, 1521, 1251.

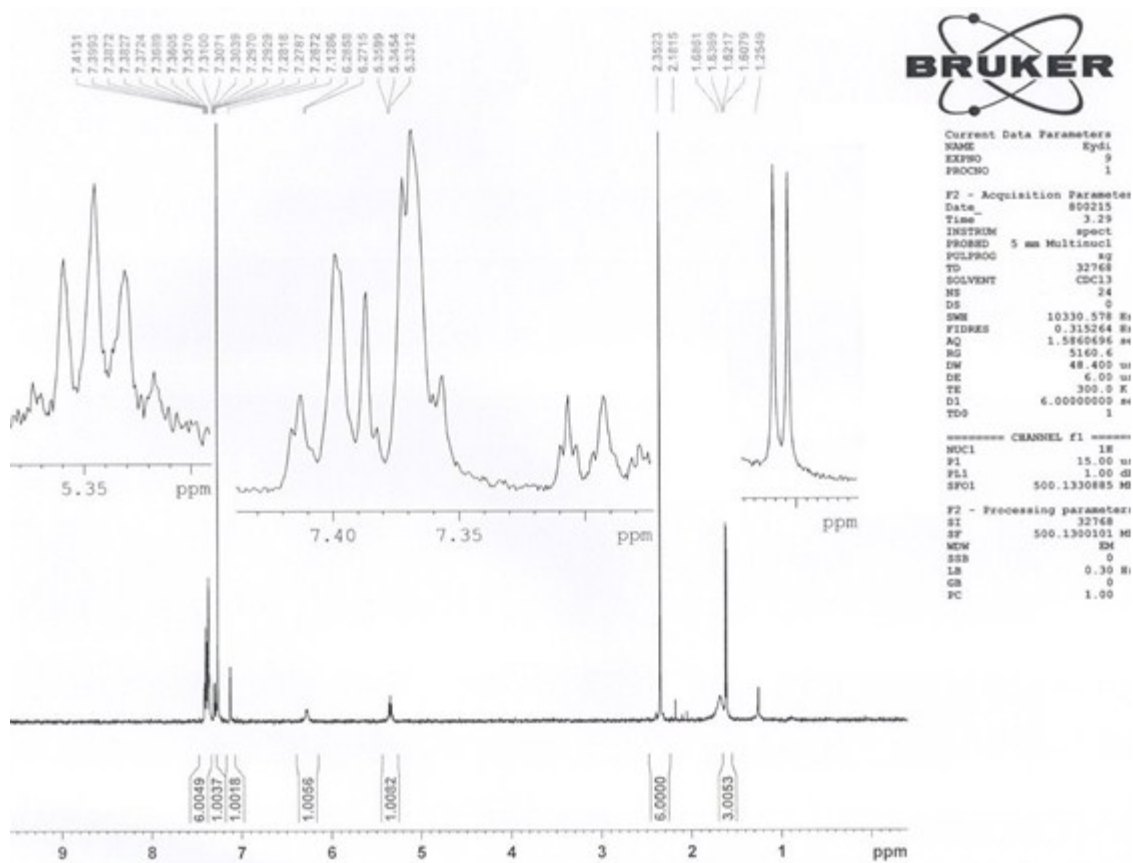

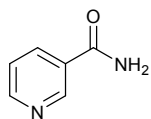

nicotinamide: Isolated yield = 53%;  $^1\text{H}$  NMR (500 MHz,  $\text{CDCl}_3$ ):  $\delta_{\text{H}}$  (ppm) = 9.03 (d, 1H), 8.77 (m, 1H), 8.17 (m, 1H), 7.43 (m, 1H), 6.00-6.22 (br, 2H,  $\text{NH}_2$ );  $^{13}\text{C}$  NMR (125 MHz,  $\text{CDCl}_3$ ):  $\delta_{\text{C}}$  (ppm) = 167.3, 152.8, 148.3, 135.5, 129.1, 123.6; FT-IR (KBr):  $\nu$  ( $\text{cm}^{-1}$ ) = 3363, 3158, 2778, 1683, 1615, 1480, 1396.

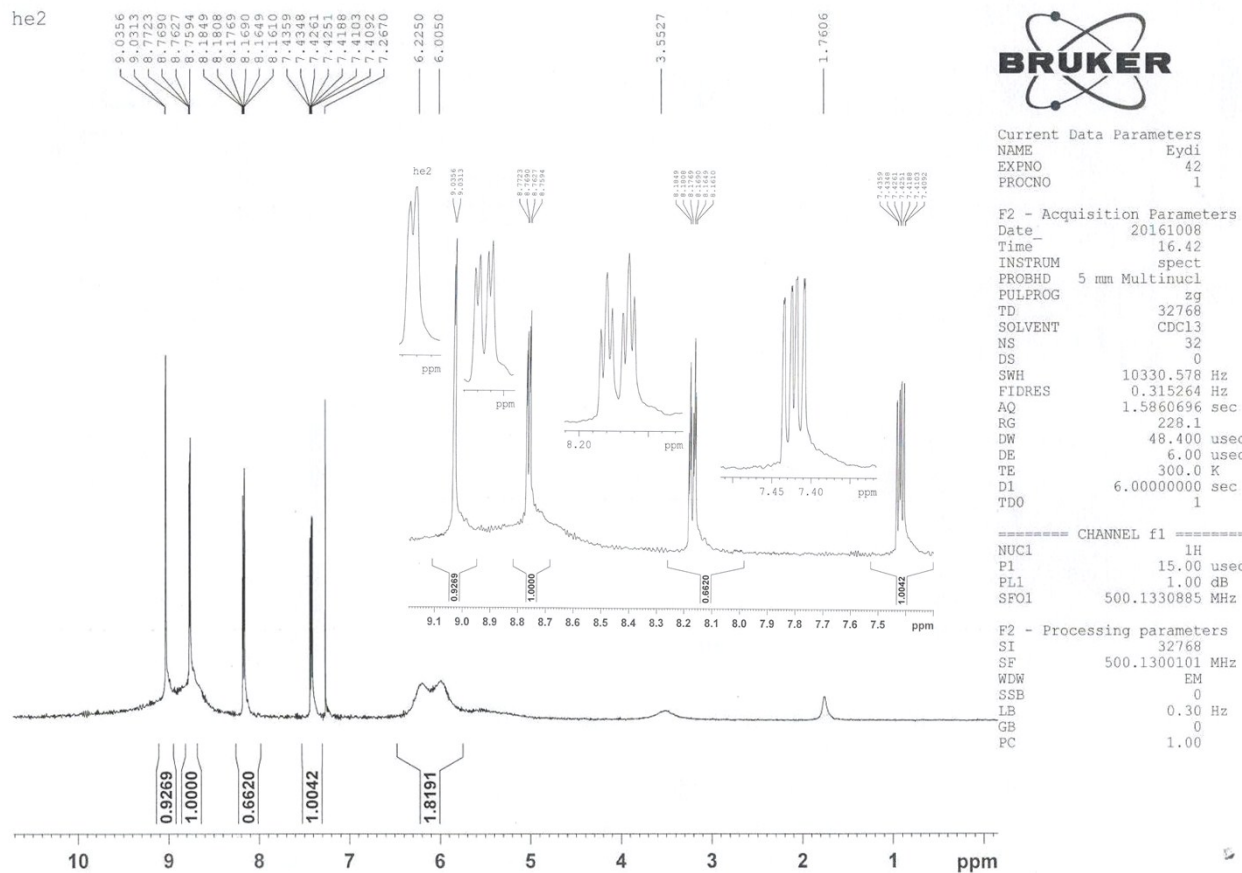

he2

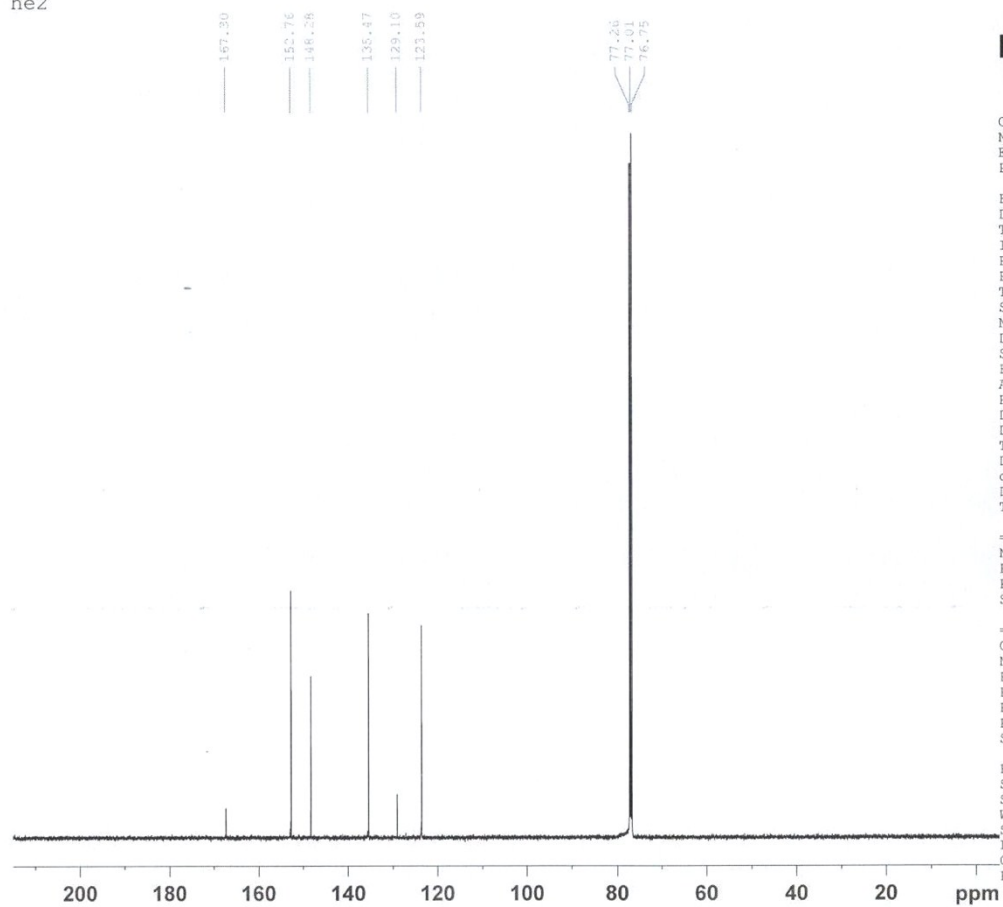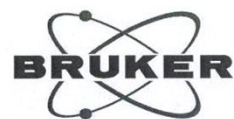

Current Data Parameters  
NAME Eydi  
EXPNO 43  
PROCNO 1

F2 - Acquisition Parameters  
Date\_ 20161009  
Time\_ 3.27  
INSTRUM spect  
PROBHD 5 mm Multinucl  
PULPROG zgpg  
TD 65536  
SOLVENT CDCl3  
NS 10240  
DS 0  
SWH 31446.541 H  
FIDRES 0.479836 H  
AQ 1.0420883 s  
RG 8192  
DW 15.900 u  
DE 6.00 u  
TE 300.0 K  
D1 2.0000000 s  
d11 0.0300000 s  
DELTA 1.89999998 s  
TD0 1

===== CHANNEL f1 =====  
NUC1 13C  
P1 10.00 u  
PL1 3.00 d  
SFO1 125.7716224 M

===== CHANNEL f2 =====  
CPDPRG2 waltz16  
NUC2 1H  
PCPD2 100.00 u  
PL2 120.00 d  
PL12 20.00 d  
PL13 20.00 d  
SFO2 500.1320005 M

F2 - Processing parameter  
SI 32768  
SF 125.7577889 M  
WDW EM  
SSB 0  
LB 1.00 H  
GB 0  
PC 1.00



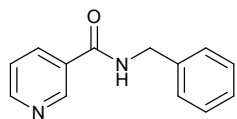

N-benzylnicotinamide: Isolated yield = 55%;  $^1\text{H}$  NMR (500 MHz,  $\text{CDCl}_3$ ):  $\delta_{\text{H}}$  (ppm) = 8.91 (s, 1H), 8.54 (d, 1H), 8.09 (d, 1H), 7.56 (br s, 1H, NH), 7.29-7.20 (m, 6H), 4.55 (d, 2H);  $^{13}\text{C}$  NMR (125 MHz,  $\text{CDCl}_3$ ):  $\delta_{\text{C}}$  (ppm) = 165.6, 151.8, 147.9, 137.9, 135.5, 130.3, 128.5, 128.0, 127.6, 123.5, 44.1; FT-IR (KBr):  $\nu$  ( $\text{cm}^{-1}$ ) = 3297, 3037, 2929, 1635, 1547, 1420, 1304, 1231.

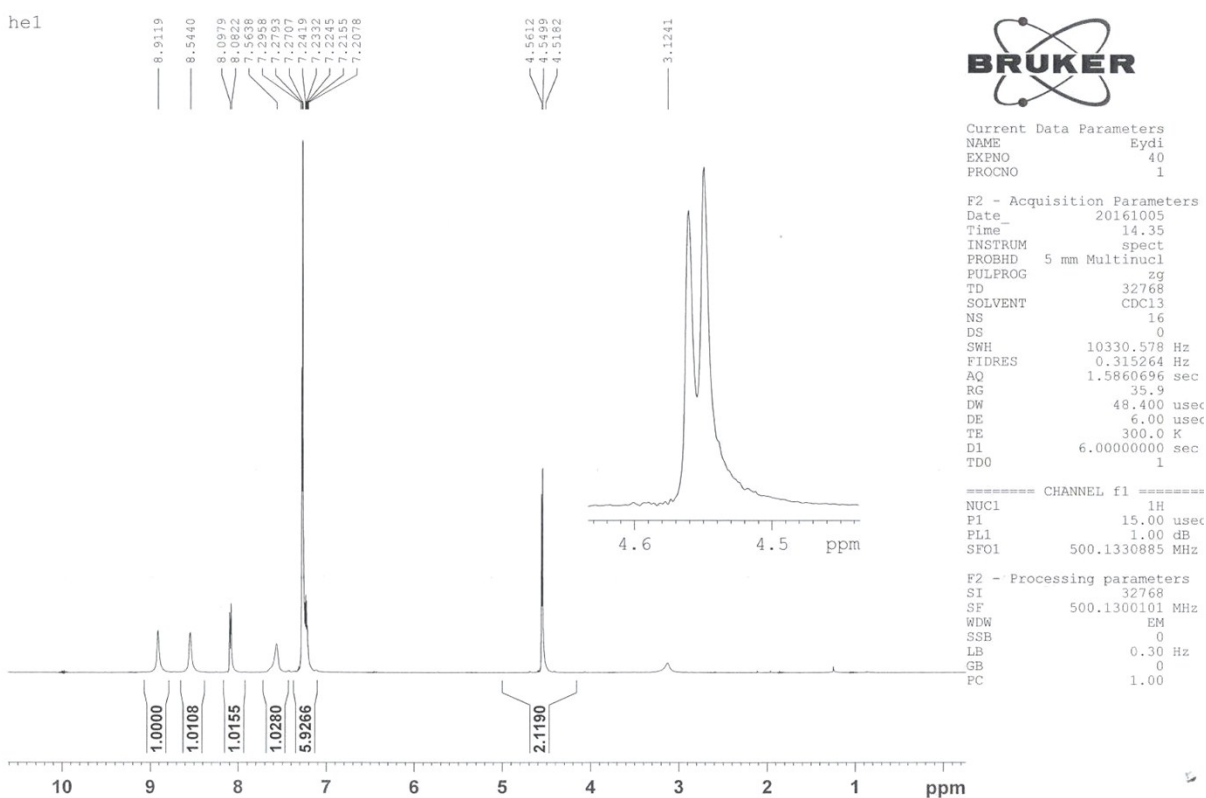

hel

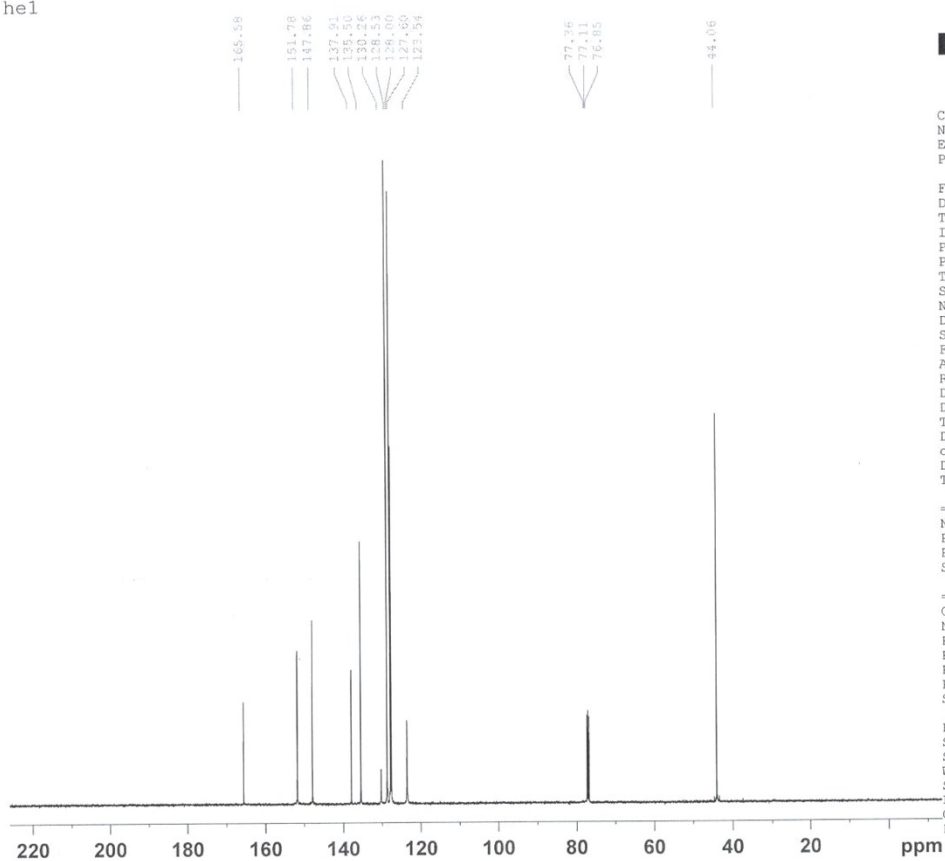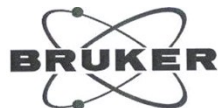

Current Data Parameters  
NAME Eydi  
EXPNO 38  
PROCNO 1

F2 - Acquisition Parameters  
Date\_ 20161003  
Time\_ 12.47  
INSTRUM spect  
PROBHD 5 mm Multinucl  
PULPROG zgpg  
TD 65536  
SOLVENT CDCl3  
NS 1024  
DS 0  
SWH 31446.541 Hz  
FIDRES 0.479836 Hz  
AQ 1.0420883 sec  
RG 4597.6  
DW 15.900 usec  
DE 6.00 usec  
TE 300.0 K  
D1 2.0000000 sec  
d11 0.0300000 sec  
DELTA 1.8999999 sec  
TDO 1

===== CHANNEL f1 =====  
NUC1 13C  
P1 10.00 usec  
PL1 3.00 dB  
SFO1 125.7716224 MHz

===== CHANNEL f2 =====  
CPDPRG2 waltz16  
NUC2 1H  
PCPD2 100.00 usec  
PL2 120.00 dB  
PL12 20.00 dB  
PL13 20.00 dB  
SFO2 500.1320005 MHz

F2 - Processing parameters  
SI 32768  
SF 125.7577912 MHz  
WDW EM  
SSB 0  
LB 1.00 Hz  
GB 0  
PC 1.00

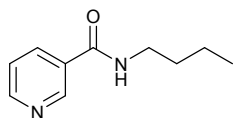

N-butylnicotinamide: Isolated yield = 46%;  $^1\text{H}$  NMR (500 MHz,  $\text{CDCl}_3$ ):  $\delta_{\text{H}}$  (ppm) = 8.96 (s, 1H), 8.62 (d, 1H), 8.09 (d, 1H), 7.31 (m, 1H), 7.05 (br s, 1H, NH), 3.40 (q, 2H), 1.56 (quintet, 2H), 1.35 (sextet, 2H), 0.87 (t, 3H);  $^{13}\text{C}$  NMR (125 MHz,  $\text{CDCl}_3$ ):  $\delta_{\text{C}}$  (ppm) = 165.6, 151.7, 147.8, 135.3, 130.7, 123.5, 39.9, 31.6, 20.1, 13.7; FT-IR (KBr):  $\nu$  ( $\text{cm}^{-1}$ ) = 3300, 3067, 2953, 1646, 1545, 1468, 1310.

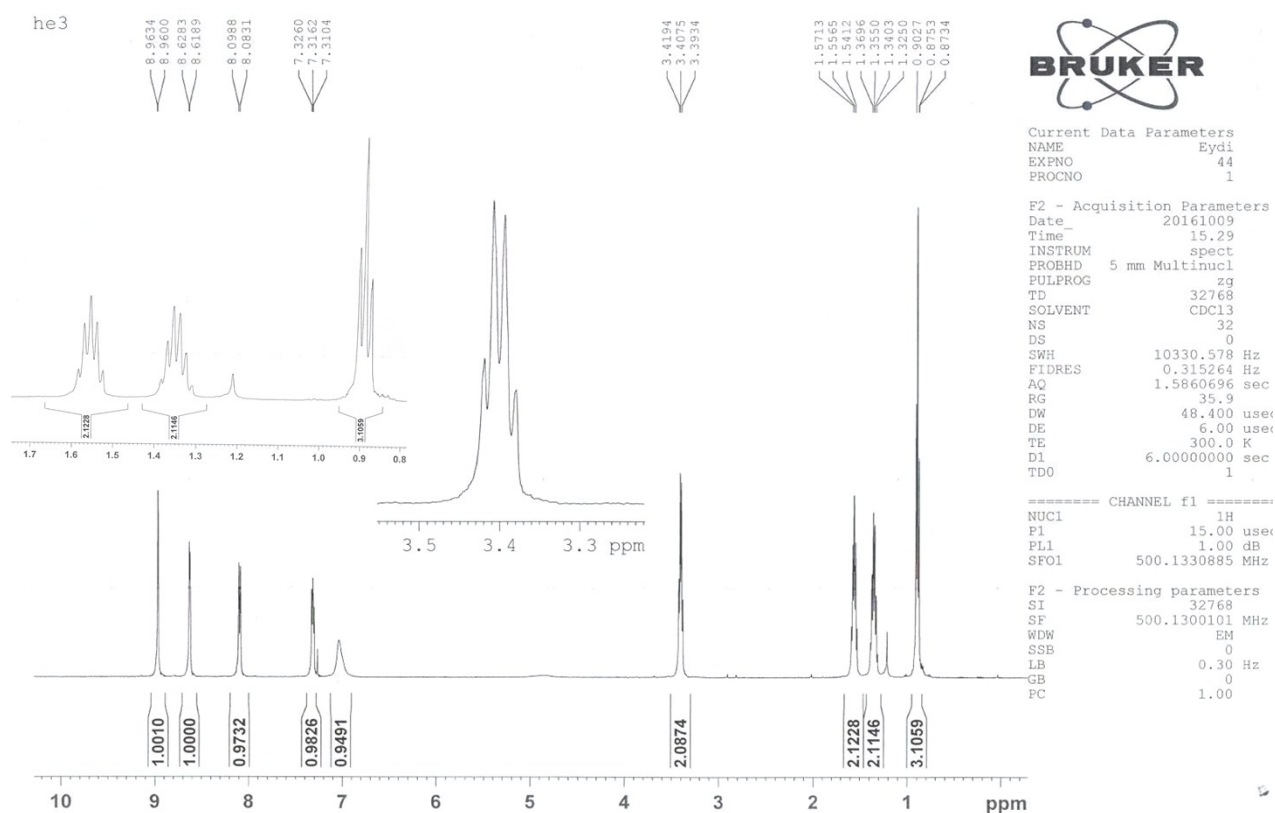

he3

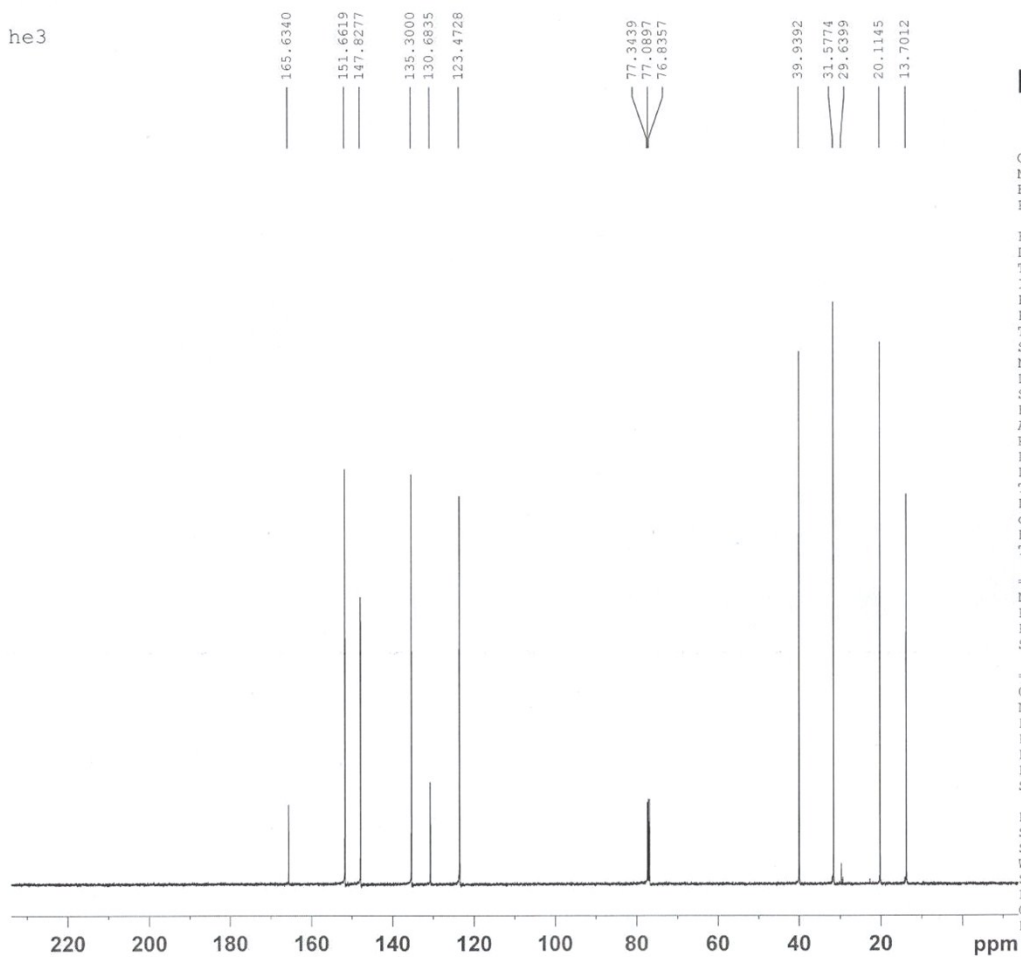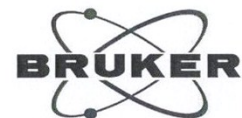

Current Data Parameters  
NAME Eydi  
EXPNO 45  
PROCNO 1

F2 - Acquisition Parameters  
Date\_ 20161009  
Time 16.00  
INSTRUM spect  
PROBHD 5 mm Multinucl  
PULPROG zgpg  
TD 65536  
SOLVENT CDC13  
NS 886  
DS 0  
SWH 31446.541 Hz  
FIDRES 0.479836 Hz  
AQ 1.0420883 sec  
RG 8192  
DW 15.900 usec  
DE 6.00 usec  
TE 300.0 K  
D1 2.00000000 sec  
d11 0.03000000 sec  
DELTA 1.89999998 sec  
TDO 1

===== CHANNEL f1 =====  
NUC1 13C  
P1 10.00 usec  
PL1 3.00 dB  
SFO1 125.7716224 MHz

===== CHANNEL f2 =====  
CPDPRG2 waltz16  
NUC2 1H  
PCPD2 100.00 usec  
PL2 120.00 dB  
PL12 20.00 dB  
PL13 20.00 dB  
SFO2 500.1320005 MHz

F2 - Processing parameters  
SI 32768  
SF 125.7577889 MHz  
WDW EM  
SSB 0  
LB 1.00 Hz  
GB 0  
PC 1.00
